# Supplementary material
Source: PubMed Central journal article supplement (PMC4896148)
Supplement: NIHMS790737-supplement-Supplementary_Information.pdf [file NIHMS790737-supplement-Supplementary_Information.pdf]

## Supporting information

### 1. DLS measurement of drug loaded polymeric micelles

Table S.1 Micelle diameter and PDI (polydispersity index) values of singly-loaded micelles, 2-in-1, or 3-in-1 polymeric micelles ( $n = 3$ , Mean  $\pm$  SD)

| Drug(s) in micelles  | Micelle diameter (nm) | PDI               |
|----------------------|-----------------------|-------------------|
| Empty*               | 38.2 $\pm$ 1.1        | 0.175 $\pm$ 0.010 |
| PTX                  | 38.8 $\pm$ 0.6        | 0.185 $\pm$ 0.009 |
| 17-AAG               | 39.3 $\pm$ 2.9        | 0.187 $\pm$ 0.004 |
| RAP                  | 36.9 $\pm$ 1.3        | 0.135 $\pm$ 0.006 |
| PTX<br>17-AAG        | 38.9 $\pm$ 1.1        | 0.184 $\pm$ 0.004 |
| RAP<br>17-AAG        | 39.4 $\pm$ 1.9        | 0.182 $\pm$ 0.032 |
| RAP<br>PTX           | 41.0 $\pm$ 1.5        | 0.195 $\pm$ 0.007 |
| RAP<br>PTX<br>17-AAG | 43.8 $\pm$ 1.3        | 0.168 $\pm$ 0.014 |

\* Empty PEG-*b*-PLA micelles were prepared by the described method in Materials and Methods without drug encapsulation

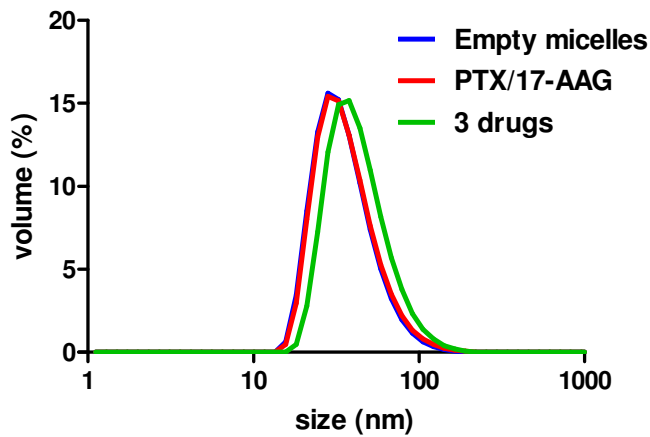

Figure S.1 Particle size distribution of Empty PEG-*b*-PLA micelles, 2-in-1 PEG-*b*-PLA micelles including PTX/17-AAG, and 3-in-1 PEG-*b*-PLA micelles of PTX/17-AAG/RAP (n = 3, Mean)

PEG-*b*-PLA with 4200 g/mol of PEG and 1900 g/mol of PLA (hydrophilic fraction = 0.69) form spherical micelles<sup>1,2</sup>. As shown in Table S.1 and Figure S.1, no significant change in PDI was observed over multi-drug solubilization, suggesting that the morphological changes do not occur after the drug loading.

## **2. *In vitro* cytotoxicity experiments for determining drug ratio of PTX/17-AAG and PTX/17-AAG/RAP in MCF-7 breast cancer cell line**

In our preliminary studies, we have screened the cytotoxicity by changing the molar ratio of PTX and 17-AAG as free drug (dissolved in DMSO) and found that more than 1:1 molar ratio of PTX and 17-AAG was synergistic in MCF-7 breast cancer cell line (Table S.2). 5:1 molar ratio of PTX and 17-AAG was chosen because 17-AAG could not be minimized due to accuracy of weighing. For RAP/PTX/17-AAG combination, we screened drug synergy by fixing PTX/17-AAG at 5:1 molar ratio and changing RAP concentration. Raising the content of RAP increased synergy (Table S.3); however, considering the encapsulation capacity of PEG-*b*-PLA micelles, we limited the RAP at 1:5:1 ratio to maintain the stability of 3-in-1 micelles

Table S.2. *CI* analysis of 2 drug combination including PTX and 17-AAG in MCF-7 breast cancer cells (free drugs dissolved in DMSO,  $n = 3$ , Mean  $\pm$  SD)

| PTX (nM) | 17-AAG (nM) | fraction affected* | <i>CI</i> | Drug interaction |
|----------|-------------|--------------------|-----------|------------------|
| 0.5      | 0.5         | 0.258 $\pm$ 0.04   | 0.94      | Synergistic      |
| 0.5      | 5           | 0.317 $\pm$ 0.03   | 2.29      | Antagonistic     |
| 0.5      | 50          | 0.517 $\pm$ 0.04   | 1.58      | Antagonistic     |
| 5        | 0.5         | 0.624 $\pm$ 0.06   | 0.16      | Synergistic      |
| 5        | 5           | 0.582 $\pm$ 0.02   | 0.28      | Synergistic      |
| 5        | 50          | 0.534 $\pm$ 0.04   | 1.29      | Antagonistic     |
| 50       | 0.5         | 0.656 $\pm$ 0.03   | 1.09      | Additive         |
| 50       | 5           | 0.720 $\pm$ 0.05   | 0.64      | Synergistic      |
| 50       | 50          | 0.761 $\pm$ 0.02   | 0.52      | Synergistic      |

\* fraction of dead cells upon drug exposure

Table S.3. *CI* analysis of 3 drug combination including PTX, 17-AAG, and RAP in MCF-7 breast cancer cells (free drugs dissolved in DMSO,  $n = 3$ , Mean  $\pm$  SD)

| PTX (nM) | 17-AAG (nM) | RAP (nM) | fraction affected | <i>CI</i> | Drug interaction |
|----------|-------------|----------|-------------------|-----------|------------------|
| 50       | 10          | 0.5      | 0.709 $\pm$ 0.02  | 0.72      | Synergistic      |
| 50       | 10          | 5        | 0.727 $\pm$ 0.04  | 0.65      | Synergistic      |
| 50       | 10          | 50       | 0.733 $\pm$ 0.05  | 0.69      | Synergistic      |
| 50       | 10          | 500      | 0.829 $\pm$ 0.02  | 0.44      | Synergistic      |

### 3. References

1. Discher, D. E.; Ahmed, F. Polymersomes. *Annu. Rev. Biomed. Eng.* **2006**, 8, 323-41.
2. Richter, A.; Olbrich, C.; Krause, M.; Kissel, T. Solubilization of sagopilone, a poorly water-soluble anticancer drug, using polymeric micelles for parenteral delivery. *Int. J. Pharm.* **2010**, 389, (1-2), 244-53.
